# Supplementary material
Source: publisher site journal article supplement (https://www.dovepress.com/article/328737)
Supplement: Supplementary file 1 [file get_supplementary_file.php]

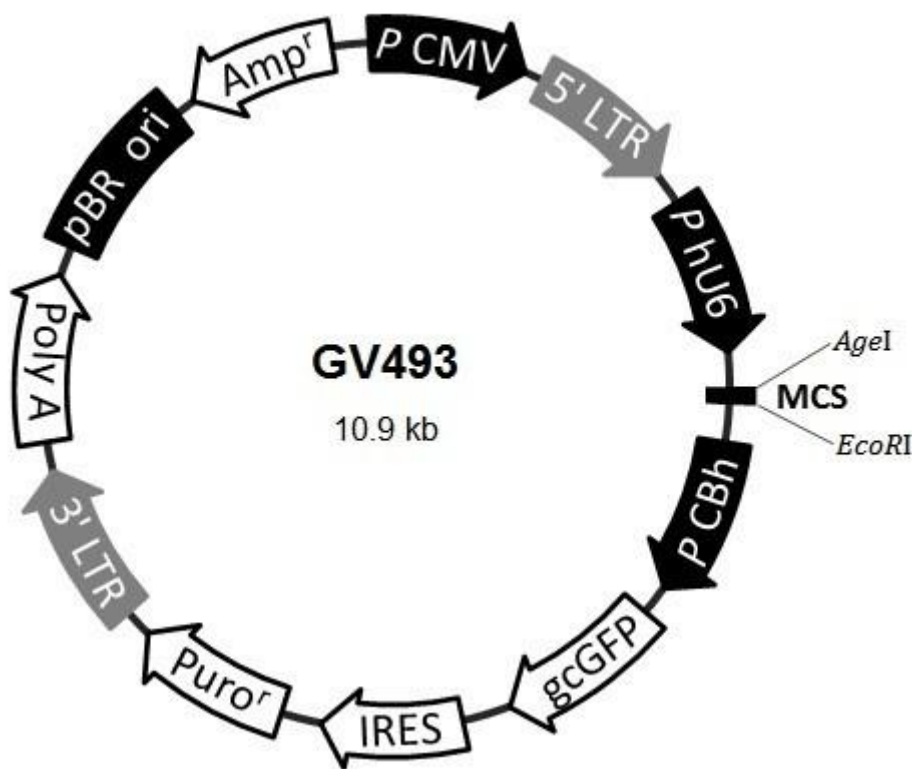

Supplementary Figure 1. The structure of the vector

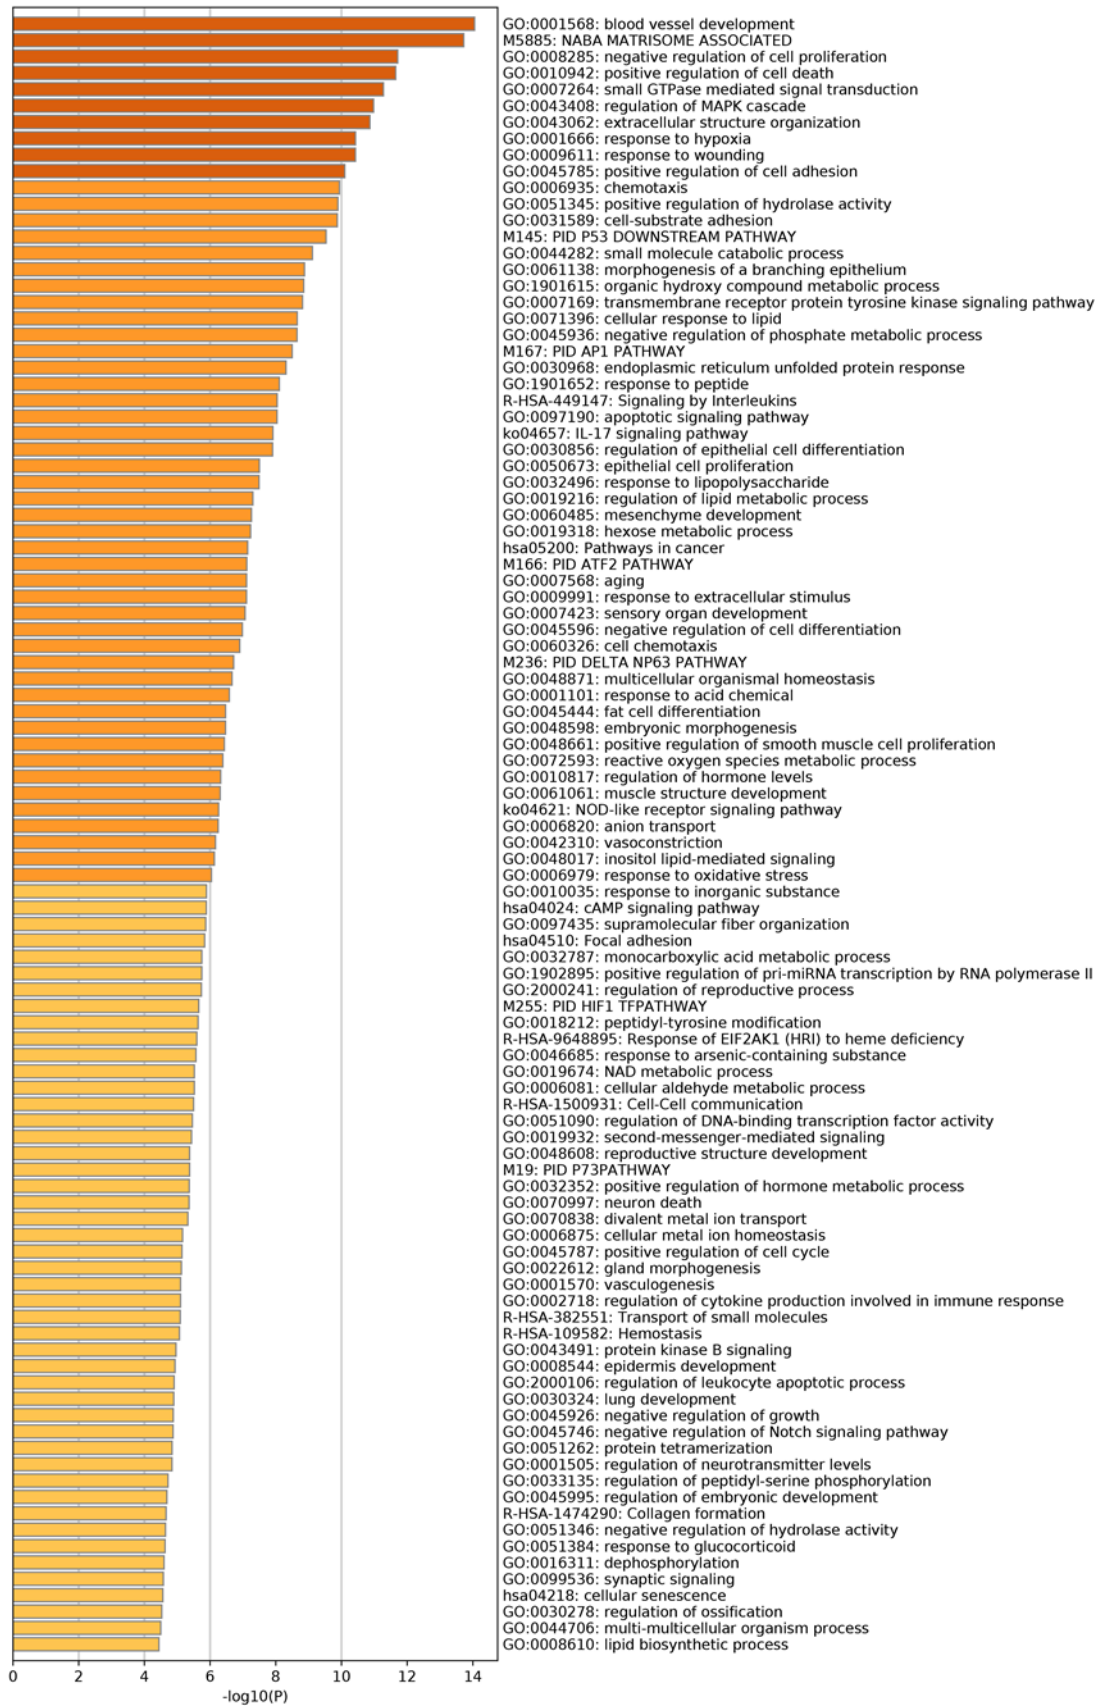

Supplementary Figure 2. Enrichment Heatmap Selection of Top 100 GO terms

Supplementary Table 1. Synthesize oligo information

| NO.                                   | 5'             | STEM                      | Loop       | STEM                      | 3'         |
|---------------------------------------|----------------|---------------------------|------------|---------------------------|------------|
| AFAP1-<br>AS1-<br>RNAi(918<br>25-1)-a | Ccgg           | TGGCAAACCAGTTCTGG<br>GCTT | CTCGA<br>G | AAGCCCAGAACTGGTTT<br>GCCA | TTTT<br>Tg |
| AFAP1-<br>AS1-<br>RNAi(918<br>25-1)-b | aattcaaa<br>aa | TGGCAAACCAGTTCTGG<br>GCTT | CTCGA<br>G | AAGCCCAGAACTGGTTT<br>GCCA |            |
| AFAP1-<br>AS1-<br>RNAi(918<br>26-1)-a | Ccgg           | CACCTTCTTTCTCTGGGA<br>AAT | CTCGA<br>G | ATTCCCAGAGAAAGAA<br>GGTG  | TTTT<br>Tg |
| AFAP1-<br>AS1-<br>RNAi(918<br>26-1)-b | aattcaaa<br>aa | CACCTTCTTTCTCTGGGA<br>AAT | CTCGA<br>G | ATTCCCAGAGAAAGAA<br>GGTG  |            |
| AFAP1-<br>AS1-<br>RNAi(918<br>27-1)-a | Ccgg           | AGGCACACGGCTTATAAT<br>TAA | CTCGA<br>G | TTAATTATAAGCCGTGTG<br>CCT | TTTT<br>Tg |
| AFAP1-<br>AS1-<br>RNAi(918<br>27-1)-b | aattcaaa<br>aa | AGGCACACGGCTTATAAT<br>TAA | CTCGA<br>G | TTAATTATAAGCCGTGTG<br>CCT |            |

Supplementary Table 2. KEGG enrichment

| ID       | Description                                                   | GeneRa | BgRatio  | pvalue   | p.adjust | qvalue   | geneID    | Count |
|----------|---------------------------------------------------------------|--------|----------|----------|----------|----------|-----------|-------|
| hsa04657 | IL-17 signaling pathway                                       | 20/546 | 94/8076  | 3.38E-06 | 0.001055 | 0.000876 | 10758/574 | 20    |
| hsa04668 | TNF signaling pathway                                         | 20/546 | 112/8076 | 5.18E-05 | 0.008083 | 0.006709 | 84699/574 | 20    |
| hsa04024 | cAMP signaling pathway                                        | 29/546 | 216/8076 | 0.000278 | 0.028929 | 0.024009 | 1387/8469 | 29    |
| hsa05323 | Rheumatoid arthritis                                          | 16/546 | 93/8076  | 0.000444 | 0.029351 | 0.02436  | 2920/7042 | 16    |
| hsa04621 | NOD-like receptor signaling pathway                           | 25/546 | 181/8076 | 0.00047  | 0.029351 | 0.02436  | 2920/7188 | 25    |
| hsa04060 | Cytokine-cytokine receptor interaction                        | 35/546 | 295/8076 | 0.000742 | 0.03858  | 0.03202  | 51330/360 | 35    |
| hsa04510 | Focal adhesion                                                | 26/546 | 201/8076 | 0.001001 | 0.044608 | 0.037022 | 9564/5063 | 26    |
| hsa04064 | NF-kappa B signaling pathway                                  | 16/546 | 104/8076 | 0.001552 | 0.054718 | 0.045414 | 5743/2920 | 16    |
| hsa04151 | PI3K-Akt signaling pathway                                    | 39/546 | 354/8076 | 0.001578 | 0.054718 | 0.045414 | 84699/226 | 39    |
| hsa04218 | Cellular senescence                                           | 21/546 | 156/8076 | 0.001813 | 0.056562 | 0.046944 | 1870/1075 | 21    |
| hsa01521 | EGFR tyrosine kinase inhibitor resistance                     | 13/546 | 79/8076  | 0.002264 | 0.064223 | 0.053303 | 2261/7422 | 13    |
| hsa05164 | Influenza A                                                   | 22/546 | 171/8076 | 0.002556 | 0.066468 | 0.055165 | 1387/5646 | 22    |
| hsa05222 | Small cell lung cancer                                        | 14/546 | 92/8076  | 0.003311 | 0.070108 | 0.058187 | 1870/5743 | 14    |
| hsa05142 | Chagas disease                                                | 15/546 | 102/8076 | 0.003371 | 0.070108 | 0.058187 | 7042/4792 | 15    |
| hsa05146 | Amoebiasis                                                    | 15/546 | 102/8076 | 0.003371 | 0.070108 | 0.058187 | 6317/2920 | 15    |
| hsa04974 | Protein digestion and absorption                              | 15/546 | 103/8076 | 0.003707 | 0.071701 | 0.059509 | 5646/5764 | 15    |
| hsa04015 | Rep1 signaling pathway                                        | 25/546 | 210/8076 | 0.003907 | 0.071701 | 0.059509 | 9564/2261 | 25    |
| hsa05134 | Legionellosis                                                 | 10/546 | 57/8076  | 0.004417 | 0.073762 | 0.06122  | 2920/4792 | 10    |
| hsa04010 | MAPK signaling pathway                                        | 32/546 | 294/8076 | 0.00486  | 0.073762 | 0.06122  | 2261/7042 | 32    |
| hsa05165 | Human papillomavirus infection                                | 35/546 | 331/8076 | 0.005252 | 0.073762 | 0.06122  | 1387/8469 | 35    |
| hsa05215 | Prostate cancer                                               | 14/546 | 97/8076  | 0.00539  | 0.073762 | 0.06122  | 1387/1870 | 14    |
| hsa05219 | Bladder cancer                                                | 8/546  | 41/8076  | 0.005429 | 0.073762 | 0.06122  | 1870/1118 | 8     |
| hsa00051 | Fructose and mannose metabolism                               | 7/546  | 33/8076  | 0.005668 | 0.073762 | 0.06122  | 57103/231 | 7     |
| hsa04978 | Mineral absorption                                            | 10/546 | 59/8076  | 0.005693 | 0.073762 | 0.06122  | 490/79901 | 10    |
| hsa05231 | Choline metabolism in cancer                                  | 14/546 | 98/8076  | 0.00591  | 0.073762 | 0.06122  | 8611/5337 | 14    |
| hsa04061 | Viral protein interaction with cytokine and cytokine receptor | 14/546 | 100/8076 | 0.007073 | 0.081507 | 0.067648 | 2920/6347 | 14    |
| hsa04933 | AGE-RAGE signaling pathway in diabetic complications          | 14/546 | 100/8076 | 0.007073 | 0.081507 | 0.067648 | 1906/7042 | 14    |
| hsa04014 | Ras signaling pathway                                         | 26/546 | 232/8076 | 0.007315 | 0.081507 | 0.067648 | 11186/226 | 26    |
| hsa05169 | Epstein-Barr virus infection                                  | 23/546 | 202/8076 | 0.009375 | 0.09796  | 0.081303 | 1870/5704 | 23    |
| hsa04115 | p53 signaling pathway                                         | 11/546 | 73/8076  | 0.009419 | 0.09796  | 0.081303 | 7161/896/ | 11    |
| hsa05202 | Transcriptional misregulation in cancer                       | 22/546 | 192/8076 | 0.010167 | 0.102327 | 0.084928 | 5327/604/ | 22    |
| hsa05135 | Yersinia infection                                            | 17/546 | 137/8076 | 0.01069  | 0.10423  | 0.086506 | 9564/2533 | 17    |
| hsa04380 | Osteoclast differentiation                                    | 16/546 | 128/8076 | 0.012202 | 0.104728 | 0.08692  | 7042/2976 | 16    |
| hsa05418 | Fluid shear stress and atherosclerosis                        | 17/546 | 139/8076 | 0.012263 | 0.104728 | 0.08692  | 1906/5327 | 17    |
| hsa05133 | Pertussis                                                     | 11/546 | 76/8076  | 0.012635 | 0.104728 | 0.08692  | 2770/3569 | 11    |
| hsa05212 | Pancreatic cancer                                             | 11/546 | 76/8076  | 0.012635 | 0.104728 | 0.08692  | 1870/5337 | 11    |
| hsa05166 | Human T-cell leukemia virus 1 infection                       | 24/546 | 219/8076 | 0.01265  | 0.104728 | 0.08692  | 1387/1870 | 24    |
| hsa05161 | Hepatitis B                                                   | 19/546 | 162/8076 | 0.012879 | 0.104728 | 0.08692  | 1387/1870 | 19    |
| hsa04926 | Relaxin signaling pathway                                     | 16/546 | 129/8076 | 0.013091 | 0.104728 | 0.08692  | 84699/190 | 16    |
| hsa00830 | Retinol metabolism                                            | 10/546 | 67/8076  | 0.013866 | 0.105579 | 0.087626 | 56603/612 | 10    |
| hsa05140 | Leishmaniasis                                                 | 11/546 | 77/8076  | 0.013874 | 0.105579 | 0.087626 | 5743/7042 | 11    |
| hsa04727 | GABAergic synapse                                             | 12/546 | 89/8076  | 0.016134 | 0.119852 | 0.099472 | 6540/778/ | 12    |
| hsa05230 | Central carbon metabolism in cancer                           | 10/546 | 70/8076  | 0.018522 | 0.134393 | 0.111541 | 2261/5710 | 10    |
| hsa05167 | Kaposi sarcoma-associated herpesvirus infection               | 21/546 | 193/8076 | 0.020314 | 0.141787 | 0.117678 | 1387/1870 | 21    |
| hsa05224 | Breast cancer                                                 | 17/546 | 147/8076 | 0.02045  | 0.141787 | 0.117678 | 1870/2246 | 17    |
| hsa05218 | Melanoma                                                      | 10/546 | 72/8076  | 0.022207 | 0.148899 | 0.12358  | 1870/2246 | 10    |
| hsa04310 | Wnt signaling pathway                                         | 18/546 | 160/8076 | 0.02243  | 0.148899 | 0.12358  | 1387/2580 | 18    |
| hsa05162 | Measles                                                       | 16/546 | 139/8076 | 0.02502  | 0.159736 | 0.132574 | 7161/4792 | 16    |
| hsa04630 | JAK-STAT signaling pathway                                    | 18/546 | 162/8076 | 0.025087 | 0.159736 | 0.132574 | 1387/2273 | 18    |
| hsa04071 | Sphingolipid signaling pathway                                | 14/546 | 119/8076 | 0.029397 | 0.175462 | 0.145627 | 56848/552 | 14    |

Supplementary Table 3. GSEA report for TCGA OSCC tumor

| NAME                                       | SIZE | ES         | NES        | NOM p-val  | FDR q-val | FWER p-val | RANK AT LEADING EDGE                  |
|--------------------------------------------|------|------------|------------|------------|-----------|------------|---------------------------------------|
| HALLMARK DNA_REPAIR                        | 150  | 0.6452855  | 1.7792888  | 0.00199601 | 0.045302  | 0.024      | 13989 tags=70%, list=25%, signal=93%  |
| HALLMARK UNFOLDED_PROTEIN_RESPONSE         | 110  | 0.64524287 | 1.7792441  | 0          | 0.022651  | 0.024      | 13844 tags=66%, list=25%, signal=92%  |
| HALLMARK MTORC1_SIGNALING                  | 198  | 0.62546444 | 1.694007   | 0.00594059 | 0.054536  | 0.067      | 12964 tags=66%, list=23%, signal=86%  |
| HALLMARK E2F_TARGETS                       | 198  | 0.7860378  | 1.6799289  | 0          | 0.049193  | 0.075      | 7413 tags=78%, list=13%, signal=89%   |
| HALLMARK MITOTIC_SPINDLE                   | 199  | 0.69071716 | 1.658022   | 0          | 0.052791  | 0.091      | 9707 tags=60%, list=17%, signal=73%   |
| HALLMARK G2M_CHECKPOINT                    | 196  | 0.7427995  | 1.6519508  | 0.00198413 | 0.04783   | 0.101      | 9934 tags=77%, list=18%, signal=93%   |
| HALLMARK MYC_TARGETS_V1                    | 196  | 0.6441084  | 1.6504803  | 0.01670146 | 0.041395  | 0.101      | 14479 tags=70%, list=26%, signal=94%  |
| HALLMARK GLYCOLYSIS                        | 199  | 0.56166184 | 1.650255   | 0.01277372 | 0.036331  | 0.101      | 10784 tags=50%, list=19%, signal=62%  |
| HALLMARK MYC_TARGETS_V2                    | 58   | 0.70326555 | 1.6338797  | 0.02057613 | 0.038027  | 0.119      | 11584 tags=78%, list=21%, signal=98%  |
| HALLMARK INTERFERON_GAMMA_RESPONSE         | 198  | 0.709834   | 1.5793331  | 0.04190476 | 0.063259  | 0.183      | 9267 tags=65%, list=17%, signal=78%   |
| HALLMARK INTERFERON_ALPHA_RESPONSE         | 96   | 0.7730088  | 1.5704821  | 0.02298851 | 0.063374  | 0.197      | 8875 tags=79%, list=16%, signal=94%   |
| HALLMARK UV_RESPONSE_UP                    | 156  | 0.51772034 | 1.5698351  | 0.02197802 | 0.058437  | 0.199      | 12758 tags=52%, list=23%, signal=67%  |
| HALLMARK ANGIOGENESIS                      | 36   | 0.68420625 | 1.5498921  | 0.03971119 | 0.068648  | 0.228      | 8409 tags=56%, list=15%, signal=65%   |
| HALLMARK EPITHELIAL_MESENCHYMAL_TRANSITION | 200  | 0.7029892  | 1.5337912  | 0.04008016 | 0.074093  | 0.251      | 6956 tags=55%, list=13%, signal=63%   |
| HALLMARK APICAL_JUNCTION                   | 200  | 0.5530708  | 1.5296863  | 0.03985507 | 0.071494  | 0.254      | 11221 tags=52%, list=20%, signal=65%  |
| HALLMARK P53_PATHWAY                       | 196  | 0.5023445  | 1.5158978  | 0.05065666 | 0.077295  | 0.288      | 10587 tags=41%, list=19%, signal=50%  |
| HALLMARK APOPTOSIS                         | 160  | 0.5324266  | 1.4930605  | 0.06805293 | 0.089311  | 0.325      | 15325 tags=61%, list=28%, signal=84%  |
| HALLMARK PI3K_AKT_MTOR_SIGNALING           | 105  | 0.53066754 | 1.488598   | 0.07962963 | 0.087294  | 0.331      | 15169 tags=67%, list=27%, signal=92%  |
| HALLMARK COMPLEMENT                        | 200  | 0.5550699  | 1.4812552  | 0.07001796 | 0.087729  | 0.343      | 11757 tags=52%, list=21%, signal=66%  |
| HALLMARK TGF_BETA_SIGNALING                | 54   | 0.6184321  | 1.4585011  | 0.08971962 | 0.099442  | 0.379      | 14031 tags=61%, list=25%, signal=82%  |
| HALLMARK WNT_BETA_CATENIN_SIGNALING        | 42   | 0.58167046 | 1.4228483  | 0.08348135 | 0.120932  | 0.431      | 10090 tags=50%, list=18%, signal=61%  |
| HALLMARK HYPOXIA                           | 200  | 0.49026576 | 1.3932887  | 0.12007169 | 0.141581  | 0.5        | 10683 tags=45%, list=19%, signal=55%  |
| HALLMARK INFLAMMATORY_RESPONSE             | 200  | 0.57047635 | 1.3857462  | 0.13148148 | 0.142605  | 0.514      | 13027 tags=57%, list=23%, signal=74%  |
| HALLMARK NOTCH_SIGNALING                   | 32   | 0.5778528  | 1.3584872  | 0.12648222 | 0.161393  | 0.549      | 15056 tags=56%, list=27%, signal=77%  |
| HALLMARK PROTEIN_SECRETION                 | 96   | 0.5558608  | 1.3560865  | 0.16893204 | 0.156997  | 0.551      | 16616 tags=72%, list=30%, signal=102% |
| HALLMARK IL2_STAT5_SIGNALING               | 199  | 0.5090145  | 1.355567   | 0.12987013 | 0.151239  | 0.551      | 9105 tags=43%, list=16%, signal=52%   |
| HALLMARK TNFA_SIGNALING_VIA_NFKB           | 200  | 0.5372671  | 1.3348306  | 0.18026565 | 0.161971  | 0.569      | 9637 tags=42%, list=17%, signal=50%   |
| HALLMARK IL6_JAK_STAT3_SIGNALING           | 87   | 0.54992425 | 1.3204484  | 0.18333334 | 0.167075  | 0.583      | 13895 tags=55%, list=25%, signal=73%  |
| HALLMARK HEDGEHOG_SIGNALING                | 36   | 0.5418442  | 1.2652144  | 0.20545454 | 0.210571  | 0.638      | 12087 tags=58%, list=22%, signal=75%  |
| HALLMARK COAGULATION                       | 138  | 0.45254573 | 1.2362733  | 0.23022847 | 0.231492  | 0.671      | 10815 tags=38%, list=19%, signal=47%  |
| HALLMARK SPERMATOGENESIS                   | 134  | 0.4327849  | 1.2311333  | 0.16535433 | 0.228416  | 0.676      | 9014 tags=29%, list=16%, signal=35%   |
| HALLMARK ALLOGRAFT_REJECTION               | 196  | 0.5328977  | 1.2234296  | 0.267658   | 0.228407  | 0.686      | 16999 tags=63%, list=31%, signal=90%  |
| HALLMARK CHOLESTEROL_HOMEOSTASIS           | 74   | 0.4271246  | 1.2000593  | 0.26145038 | 0.242447  | 0.709      | 15876 tags=54%, list=29%, signal=76%  |
| HALLMARK KRAS_SIGNALING_UP                 | 199  | 0.4572746  | 1.1915507  | 0.27041742 | 0.242547  | 0.714      | 10378 tags=41%, list=19%, signal=50%  |
| HALLMARK ESTROGEN_RESPONSE_LATE            | 200  | 0.38959563 | 1.1783155  | 0.23707666 | 0.245623  | 0.718      | 7618 tags=31%, list=14%, signal=35%   |
| HALLMARK APICAL_SURFACE                    | 44   | 0.44719255 | 1.1678874  | 0.2647059  | 0.247767  | 0.727      | 5038 tags=32%, list=9%, signal=35%    |
| HALLMARK HEME_METABOLISM                   | 196  | 0.39394072 | 1.1603714  | 0.2834507  | 0.248747  | 0.738      | 13751 tags=43%, list=25%, signal=57%  |
| HALLMARK UV_RESPONSE_DN                    | 144  | 0.45386428 | 1.0587609  | 0.42913386 | 0.340273  | 0.814      | 11590 tags=43%, list=21%, signal=54%  |
| HALLMARK PANCREAS_BETA_CELLS               | 40   | 0.36517042 | 0.97355086 | 0.5082873  | 0.426566  | 0.859      | 13876 tags=40%, list=25%, signal=53%  |
| HALLMARK REACTIVE_OXYGEN_SPECIES_PATHWAY   | 49   | 0.33396947 | 0.9717423  | 0.5        | 0.418198  | 0.861      | 16080 tags=47%, list=29%, signal=66%  |
| HALLMARK PEROXISOME                        | 104  | 0.31409073 | 0.929327   | 0.5434028  | 0.451302  | 0.877      | 10597 tags=30%, list=19%, signal=37%  |
| HALLMARK ANDROGEN_RESPONSE                 | 99   | 0.34342694 | 0.9011799  | 0.576779   | 0.474947  | 0.89       | 8751 tags=28%, list=16%, signal=34%   |

Supplementary Table 4. GSEA report for TCGA OSCC AFAP1-AS1 positive

| NAME                                       | SIZE | ES         | NES       | NOM p-val  | FDR q-val   | FWER p-val | RANK AT N LEADING EDGE                |
|--------------------------------------------|------|------------|-----------|------------|-------------|------------|---------------------------------------|
| HALLMARK_G2M_CHECKPOINT                    | 196  | 0.74629456 | 2.2247572 | 0          | 0           | 0          | 10223 tags=82%, list=18%, signal=100% |
| HALLMARK_E2F_TARGETS                       | 198  | 0.7425431  | 2.2139285 | 0          | 0           | 0          | 8752 tags=74%, list=16%, signal=88%   |
| HALLMARK_MTORC1_SIGNALING                  | 198  | 0.7037224  | 2.0952759 | 0          | 0           | 0          | 12462 tags=77%, list=22%, signal=99%  |
| HALLMARK_MYC_TARGETS_V1                    | 196  | 0.70252603 | 2.0938375 | 0          | 0           | 0          | 9294 tags=67%, list=17%, signal=80%   |
| HALLMARK_MYC_TARGETS_V2                    | 58   | 0.7320118  | 2.0835984 | 0          | 0           | 0          | 9141 tags=71%, list=16%, signal=85%   |
| HALLMARK_MITOTIC_SPINDLE                   | 199  | 0.6912418  | 2.078484  | 0          | 0           | 0          | 12904 tags=76%, list=23%, signal=99%  |
| HALLMARK_PROTEIN_SECRETION                 | 96   | 0.6688995  | 1.9558089 | 0          | 0           | 0          | 13179 tags=73%, list=24%, signal=95%  |
| HALLMARK_ANDROGEN_RESPONSE                 | 99   | 0.6438273  | 1.8835975 | 0          | 0           | 0          | 10413 tags=56%, list=19%, signal=68%  |
| HALLMARK_UNFOLDED_PROTEIN_RESPONSE         | 110  | 0.6318518  | 1.8524572 | 0          | 0           | 0          | 11568 tags=65%, list=21%, signal=83%  |
| HALLMARK_TGF_BETA_SIGNALING                | 54   | 0.64472616 | 1.8228045 | 0          | 1.00E-04    | 0.001      | 13351 tags=70%, list=24%, signal=93%  |
| HALLMARK_NOTCH_SIGNALING                   | 32   | 0.673875   | 1.8190925 | 0          | 9.09E-05    | 0.001      | 12294 tags=66%, list=22%, signal=84%  |
| HALLMARK_PI3K_AKT_MTOR_SIGNALING           | 105  | 0.6178622  | 1.8033425 | 0          | 8.33E-05    | 0.001      | 13230 tags=67%, list=24%, signal=87%  |
| HALLMARK_GLYCOLYSIS                        | 199  | 0.59878564 | 1.7820572 | 0          | 7.69E-05    | 0.001      | 13160 tags=59%, list=24%, signal=77%  |
| HALLMARK_ESTROGEN_RESPONSE_EARLY           | 200  | 0.58781683 | 1.763922  | 0          | 7.14E-05    | 0.001      | 13593 tags=58%, list=24%, signal=76%  |
| HALLMARK_UV_RESPONSE_UP                    | 156  | 0.5981204  | 1.761776  | 0          | 1.33E-04    | 0.002      | 11577 tags=56%, list=21%, signal=71%  |
| HALLMARK_UV_RESPONSE_DN                    | 144  | 0.59347975 | 1.7463686 | 0          | 1.25E-04    | 0.002      | 17636 tags=71%, list=23%, signal=104% |
| HALLMARK_ADIPOGENESIS                      | 199  | 0.5835229  | 1.7388382 | 0          | 1.18E-04    | 0.002      | 11765 tags=54%, list=21%, signal=69%  |
| HALLMARK_EPITHELIAL_MESENCHYMAL_TRANSITION | 200  | 0.5794751  | 1.72985   | 0          | 1.11E-04    | 0.002      | 16857 tags=68%, list=20%, signal=97%  |
| HALLMARK_INFLAMMATORY_RESPONSE             | 200  | 0.57002664 | 1.7077427 | 0          | 2.11E-04    | 0.004      | 17020 tags=65%, list=31%, signal=93%  |
| HALLMARK_OXIDATIVE_PHOSPHORYLATION         | 200  | 0.5714853  | 1.7063427 | 0          | 2.50E-04    | 0.005      | 9253 tags=46%, list=17%, signal=55%   |
| HALLMARK_DNA_REPAIR                        | 150  | 0.57484376 | 1.7026342 | 0          | 2.38E-04    | 0.005      | 11158 tags=49%, list=20%, signal=62%  |
| HALLMARK_HEME_METABOLISM                   | 196  | 0.5655724  | 1.6980306 | 0          | 2.27E-04    | 0.005      | 13696 tags=54%, list=25%, signal=71%  |
| HALLMARK_WNT_BETA_CATENIN_SIGNALING        | 42   | 0.6079776  | 1.6923085 | 0          | 2.17E-04    | 0.005      | 11263 tags=55%, list=20%, signal=69%  |
| HALLMARK_FATTY_ACID_METABOLISM             | 157  | 0.56730145 | 1.6884434 | 0          | 2.08E-04    | 0.005      | 9694 tags=48%, list=17%, signal=58%   |
| HALLMARK_ESTROGEN_RESPONSE_LATE            | 200  | 0.5618763  | 1.6859959 | 0          | 2.00E-04    | 0.005      | 13593 tags=54%, list=24%, signal=71%  |
| HALLMARK_REACTIVE_OXYGEN_SPECIES_PATHWAY   | 49   | 0.59288985 | 1.6656048 | 0          | 2.31E-04    | 0.006      | 12166 tags=51%, list=22%, signal=65%  |
| HALLMARK_SPERMATOGENESIS                   | 134  | 0.5626934  | 1.6576073 | 0          | 2.59E-04    | 0.007      | 13587 tags=53%, list=24%, signal=70%  |
| HALLMARK_HEDGEHOG_SIGNALING                | 36   | 0.60384    | 1.655545  | 0.00102354 | 2.50E-04    | 0.007      | 11335 tags=58%, list=20%, signal=73%  |
| HALLMARK_APOPTOSIS                         | 160  | 0.55448776 | 1.6488194 | 0          | 2.76E-04    | 0.008      | 13403 tags=51%, list=24%, signal=67%  |
| HALLMARK_TNFA_SIGNALING_VIA_NFKB           | 200  | 0.5495397  | 1.6431664 | 0          | 2.67E-04    | 0.008      | 17289 tags=63%, list=31%, signal=91%  |
| HALLMARK_IL6_JAK_STAT3_SIGNALING           | 87   | 0.55679315 | 1.6230671 | 0          | 2.58E-04    | 0.008      | 16694 tags=62%, list=30%, signal=89%  |
| HALLMARK_BILE_ACID_METABOLISM              | 112  | 0.5522266  | 1.6209872 | 0          | 2.50E-04    | 0.008      | 11435 tags=50%, list=21%, signal=63%  |
| HALLMARK_PEROXISOME                        | 104  | 0.55287796 | 1.6092043 | 0          | 3.94E-04    | 0.013      | 9357 tags=50%, list=17%, signal=60%   |
| HALLMARK_ANGIOGENESIS                      | 36   | 0.5849081  | 1.6015522 | 0.00306122 | 4.12E-04    | 0.014      | 12195 tags=58%, list=22%, signal=75%  |
| HALLMARK_XENOBIOTIC_METABOLISM             | 198  | 0.5360463  | 1.5992119 | 0          | 4.86E-04    | 0.017      | 13276 tags=53%, list=24%, signal=69%  |
| HALLMARK_HYPOXIA                           | 200  | 0.52903754 | 1.5952027 | 0          | 6.12E-04    | 0.022      | 14416 tags=52%, list=26%, signal=70%  |
| HALLMARK_APICAL_SURFACE                    | 44   | 0.5692939  | 1.5948368 | 0.00201207 | 5.96E-04    | 0.022      | 15020 tags=64%, list=27%, signal=87%  |
| HALLMARK_IL2_STATS_SIGNALING               | 199  | 0.5256712  | 1.5649533 | 0          | 8.69E-04    | 0.033      | 16111 tags=56%, list=29%, signal=78%  |
| HALLMARK_KRAS_SIGNALING_UP                 | 199  | 0.5290634  | 1.5636257 | 0          | 8.47E-04    | 0.033      | 15915 tags=57%, list=29%, signal=79%  |
| HALLMARK_APICAL_JUNCTION                   | 200  | 0.5223029  | 1.5559175 | 0          | 9.51E-04    | 0.037      | 18118 tags=62%, list=33%, signal=91%  |
| HALLMARK_COMPLEMENT                        | 200  | 0.5155343  | 1.5361603 | 0          | 0.001343454 | 0.054      | 15978 tags=56%, list=29%, signal=78%  |
| HALLMARK_CHOLESTEROL_HOMEOSTASIS           | 74   | 0.53234845 | 1.51958   | 0.001      | 0.001789601 | 0.073      | 14338 tags=51%, list=26%, signal=69%  |
| HALLMARK_KRAS_SIGNALING_DN                 | 199  | 0.4872019  | 1.4594383 | 0          | 0.004126737 | 0.163      | 19857 tags=59%, list=36%, signal=92%  |
| HALLMARK_P53_PATHWAY                       | 196  | 0.48443833 | 1.4437654 | 0          | 0.005081184 | 0.203      | 16943 tags=57%, list=31%, signal=81%  |
| HALLMARK_ALLOGRAFT_REJECTION               | 196  | 0.46986198 | 1.4027046 | 0.001      | 0.008244476 | 0.305      | 14227 tags=39%, list=26%, signal=53%  |
| HALLMARK_COAGULATION                       | 138  | 0.45511463 | 1.3521607 | 0.004      | 0.015797907 | 0.531      | 16805 tags=49%, list=30%, signal=70%  |
| HALLMARK_MYOGENESIS                        | 199  | 0.4516461  | 1.3418391 | 0.001      | 0.017657226 | 0.586      | 17643 tags=45%, list=32%, signal=66%  |
| HALLMARK_INTERFERON_GAMMA_RESPONSE         | 198  | 0.44586277 | 1.3273268 | 0.002      | 0.02085915  | 0.657      | 17148 tags=49%, list=31%, signal=71%  |
| HALLMARK_PANCREAS_BETA_CELLS               | 40   | 0.44553512 | 1.2221217 | 0.17741935 | 0.07274013  | 0.982      | 13574 tags=38%, list=24%, signal=50%  |
| HALLMARK_INTERFERON_ALPHA_RESPONSE         | 96   | 0.39566496 | 1.150148  | 0.1981982  | 0.15883394  | 1          | 21213 tags=60%, list=38%, signal=98%  |

Supplementary Table 5. GSEA report for sh-nc

| NAME                                     | SIZE | ES        | NES        | NOM p-val   | FDR q-val  | FWER p-val | RANK AT N LEADING EDGE               |
|------------------------------------------|------|-----------|------------|-------------|------------|------------|--------------------------------------|
| HALLMARK_MYC_TARGETS_V2                  | 58   | 0.4503603 | 1.8610045  | 0           | 0.00342539 | 0.004      | 4934 tags=36%, list=15%, signal=42%  |
| HALLMARK_FATTY_ACID_METABOLISM           | 150  | 0.3196943 | 1.5751292  | 0           | 0.04358355 | 0.091      | 4746 tags=27%, list=14%, signal=32%  |
| HALLMARK_MYC_TARGETS_V1                  | 196  | 0.3056746 | 1.5570745  | 0.003267974 | 0.03556569 | 0.107      | 10765 tags=44%, list=32%, signal=65% |
| HALLMARK_HYPOXIA                         | 194  | 0.2888853 | 1.4860667  | 0           | 0.04642299 | 0.176      | 5070 tags=32%, list=15%, signal=38%  |
| HALLMARK_OXIDATIVE_PHOSPHORYLATION       | 184  | 0.2689977 | 1.3726331  | 0.013245033 | 0.10008589 | 0.413      | 7329 tags=32%, list=22%, signal=40%  |
| HALLMARK_ADIPOGENESIS                    | 194  | 0.2487298 | 1.2725424  | 0.020761246 | 0.18870343 | 0.703      | 4904 tags=23%, list=15%, signal=27%  |
| HALLMARK_E2F_TARGETS                     | 198  | 0.2468181 | 1.2647983  | 0.055555556 | 0.17410497 | 0.727      | 4934 tags=22%, list=15%, signal=26%  |
| HALLMARK_PEROXISOME                      | 100  | 0.2629742 | 1.2091644  | 0.14763232  | 0.23101008 | 0.862      | 5076 tags=25%, list=15%, signal=29%  |
| HALLMARK_GLYCOLYSIS                      | 196  | 0.2357699 | 1.2041322  | 0.077380955 | 0.2129317  | 0.871      | 5178 tags=24%, list=16%, signal=29%  |
| HALLMARK_INTERFERON_GAMMA_RESPONSE       | 196  | 0.2231481 | 1.1322472  | 0.173333333 | 0.31897497 | 0.971      | 4746 tags=23%, list=14%, signal=27%  |
| HALLMARK_ESTROGEN_RESPONSE_LATE          | 190  | 0.2223513 | 1.125871   | 0.1826923   | 0.30336136 | 0.975      | 5096 tags=24%, list=15%, signal=28%  |
| HALLMARK_INTERFERON_ALPHA_RESPONSE       | 95   | 0.2350829 | 1.0760702  | 0.25872093  | 0.38991925 | 0.995      | 4746 tags=20%, list=14%, signal=23%  |
| HALLMARK_G2M_CHECKPOINT                  | 194  | 0.2036195 | 1.0465093  | 0.3097643   | 0.43397725 | 1          | 5069 tags=20%, list=15%, signal=24%  |
| HALLMARK_NOTCH_SIGNALING                 | 32   | 0.2672567 | 0.97626424 | 0.5060827   | 0.59255594 | 1          | 4924 tags=22%, list=15%, signal=26%  |
| HALLMARK_WNT_BETA_CATENIN_SIGNALING      | 42   | 0.2519513 | 0.96540415 | 0.52870816  | 0.5828644  | 1          | 5027 tags=24%, list=15%, signal=28%  |
| HALLMARK_REACTIVE_OXYGEN_SPECIES_PATHWAY | 49   | 0.1944221 | 0.78409606 | 0.824147    | 0.915005   | 1          | 6885 tags=27%, list=21%, signal=33%  |

Supplementary Table 6. myc-target genes

|         |         |          |         |         |
|---------|---------|----------|---------|---------|
| HSPD1   | PPIA    | RPS5     | MCM2    | UTP20   |
| CDK4    | G3BP1   | SRPK1    | EIF4H   | SUPV3L1 |
| GNL3    | PSMD1   | RFC4     | HNRNPA2 | BYSL    |
| MCM5    | RPL34   | PSMC4    | RPS10   | DCTPP1  |
| PHB     | NHP2    | CCNA2    | SNRPD3  | WDR43   |
| NPM1    | KPNB1   | EIF3D    | SF3B3   | SLC29A2 |
| CBX3    | CCT2    | SNRPA    | KPNA2   | GRWD1   |
| DDX18   | CDC20   | PSMA7    | PPM1G   | DUSP2   |
| MYC     | SSB     | PSMB2    | SNRPA1  | MAP3K6  |
| NOLC1   | PSMD3   | PTGES3   | DHX15   | MRTO4   |
| HSPE1   | PABPC4  | SNRPD1   | ORC2    | SLC19A1 |
| AIMP2   | VBP1    | RUVBL2   | DUT     | HK2     |
| NOP56   | GLO1    | NCBP1    | CCT5    | NIP7    |
| RRP9    | PRDX3   | PSMD8    | RANBP1  | IMP4    |
| SRM     | SRSF1   | CDC45    | FBL     | NOP2    |
| MCM4    | CLNS1A  | SRSF7    | TARDBP  | NDUF4F4 |
| NOP16   | XPOT    | HDAC2    | USP1    | FARSA   |
| PA2G4   | U2AF1   | HNRNPU   | TRIM28  | RCL1    |
| PRPF31  | PHB2    | SET      | STARD7  | PLK4    |
| HDGF    | IARS    | MRPL9    | DDX21   | NOC4L   |
| POLE3   | XRCC6   | NME1     | AP3S1   | EXOSC5  |
| TOMM70A | TXNL4A  | PCNA     | PSMD7   | TFB2M   |
| PSMA2   | ERH     | ABCE1    | SF3A1   | SORD    |
| UBA2    | EEF1B2  | COPS5    | KARS    | MPHOSPH |
| MRPL23  | C1QBP   | HNRNPA3  | RAN     | TMEM97  |
| SRSF2   | PRPS2   | CSTF2    | PWP1    | MYBBP1A |
| PSMA4   | RSL1D1  | ILF2     | EIF2S2  | TCOF1   |
| GOT2    | RPLP0   | HSP90AB1 | PSMD14  | PUS1    |
| TYMS    | HNRNPD  | PRDX4    | TRA2B   | UNG     |
| DEK     | NCBP2   | RPS6     | RAD23B  | TBRG4   |
| PSMA6   | EIF4E   | FAM120A  | ETF1    | PLK1    |
| POLD2   | PCBP1   | CCT3     | TFDP1   | LAS1L   |
| HDDC2   | UBE2E1  | RPL18    | CDK2    | PES1    |
| CNBP    | EIF3J   | CANX     | HNRNPC  | PPAN    |
| RPS2    | SYNCRIP | RPL22    | PSMC6   | PPRC1   |
| YWHAQ   | SMARCC1 | CYC1     | EIF4A1  | RRP12   |
| RNPS1   | APEX1   | LDHA     | MAD2L1  | PRMT3   |
| CCT4    | ACP1    | EIF2S1   | EXOSC7  | WDR74   |
| SNRPG   | TUFM    | SRSF3    | LSM7    | RABEPK  |
| XPO1    | RPL6    | EPRS     | RRM1    | IPO4    |
| EIF4G2  | TCP1    | PSMA1    | ODC1    |         |
| BUB3    | SSBP1   | GSPT1    | SNRPB2  |         |
| HNRNPR  | NDUFAB1 | MRPS18B  | NAP1L1  |         |
| COX5A   | GNB2L1  | RPL14    | CUL1    |         |
| SLC25A3 | SERBP1  | MCM6     | PGK1    |         |
| EIF1AX  | UBE2L3  | HNRNPA1  | YWHAE   |         |
| CAD     | RPS3    | IFRD1    | MCM7    |         |
| CTPS    | HPRT1   | LSM2     | CCT7    |         |
| VDAC3   | H2AFZ   | PABPC1   | SNRPD2  |         |
| VDAC1   | EIF3B   | IMPDH2   | PSMB3   |         |
